# Supplementary material for: Clinical Risk Stratification for Primary Prevention Implantable Cardioverter Defibrillators
Source: PubMed Central journal article supplement — Circ Heart Fail. 2015 Sep 15;8(5):927–37. doi: 10.1161/CIRCHEARTFAILURE.115.002414 (PMC4568903; doi:10.1161/circheartfailure.115.002414), 2015-09-15
Supplement: hhf-8-927-s001.pdf [file hhf-8-927-s001.pdf]

**Appendix Table A. Comparison of study cohort vs. those with missing data, n(%) or median (25<sup>th</sup>, 75<sup>th</sup> percentiles)**

| Category               | Variable                         | STUDY COHORT      | MISSING           | P-value |
|------------------------|----------------------------------|-------------------|-------------------|---------|
| N                      |                                  | 3445              | 717               |         |
| Demographic            | Age, years                       | 66 (58, 73)       | 66 (59, 73)       | 0.255   |
|                        | Male                             | 2746 (79.7%)      | 570 (79.5%)       | 0.898   |
| Heart disease etiology | Ischemic, revascularized         | 481(14.0%)        | 194(27.1%)        | <.001   |
|                        | Ischemic, not revascularized     | 2193 (63.7%)      | 300 (41.8%)       |         |
|                        | Non-ischemic                     | 771 (22.4%)       | 223 (31.1%)       |         |
| Arrhythmias            | Non-sustained VT                 | 372 (10.8%)       | 79 (11.0%)        | 0.863   |
|                        | Atrial fibrillation              | 900 (26.1%)       | 229 (31.9%)       | 0.001   |
|                        | Syncope                          | 222 (6.4%)        | 59 (8.2%)         | 0.083   |
|                        | Pre-existing pacemaker system    | 86 (2.5%)         | 186 (25.9%)       | <.001   |
| CV profile             | Prior HF hospitalization         | 1308 (38.0%)      | 433 (60.4%)       | <.001   |
|                        | Hypertension                     | 1977 (57.4%)      | 378 (52.7%)       | 0.022   |
|                        | Diabetes: insulin or oral agents | 1133 (32.9%)      | 223 (31.1%)       | 0.353   |
|                        | Smoker                           | 2070 (60.1%)      | 368 (51.3%)       | <.001   |
|                        | Stroke or TIA                    | 123 (3.6%)        | 37 (5.2%)         | 0.044   |
|                        | Peripheral vascular disease      | 334 (9.7%)        | 81 (11.3%)        | 0.193   |
| CCS angina class       | I or none                        | 2512 (72.9%)      | 471 (65.7%)       | <.001   |
|                        | II-IV                            | 270 (7.8%)        | 53 (7.4%)         |         |
| NYHA class             | I-II                             | 2248 (65.3%)      | 430 (60.0%)       | 0.007   |
|                        | III-IV                           | 1197 (34.7%)      | 287 (40.0%)       |         |
| Comorbidities          | COPD                             | 443 (12.9%)       | 74 (10.3%)        | 0.061   |
|                        | Cancer                           | 295 (8.6%)        | 57 (7.9%)         | 0.591   |
|                        | Cognitive impairment             | 14 (0.4%)         | SC                | 0.574   |
|                        | Home oxygen use                  | 16 (0.5%)         | SC                | 0.215   |
| Physical               | Able to walk without support     | 3270 (94.9%)      | 669 (93.3%)       | 0.081   |
|                        | Systolic BP, mmHg                | 120 (109, 134)    | 119 (107.5, 131)  | 0.091   |
| Medications            | β-adrenoreceptor antagonist      | 3096 (89.9%)      | 651 (90.8%)       | 0.452   |
|                        | ACE inhibitor or ARB             | 3132 (90.9%)      | 650 (90.7%)       | 0.827   |
|                        | Spironolactone                   | 1128 (32.7%)      | 217 (30.3%)       | 0.197   |
|                        | Loop diuretics                   | 2255 (65.5%)      | 500 (69.7%)       | 0.028   |
|                        | Digoxin                          | 841 (24.4%)       | 191 (26.6%)       | 0.209   |
|                        | Amiodarone                       | 270 (7.8%)        | 55 (7.7%)         | 0.880   |
|                        | HMG-coA reductase inhibitor      | 2579 (74.9%)      | 462 (64.4%)       | <.001   |
|                        | Anti-platelet agent*             | 2273 (66.0%)      | 393 (54.8%)       | <.001   |
| Laboratory             | Hemoglobin, g/dL                 | 13.8 (12.6, 14.8) | 13.6 (12.5, 14.6) | 0.012   |
|                        | Sodium, mEq/L                    | 139 (137, 141)    | 139 (137,141)     | 0.921   |
|                        | Creatinine, mg/dL                | 1.09 (0.92, 1.36) | 1.13 (0.96, 1.44) | 0.001   |
|                        | Creatinine, μmol/L               | 96 (81, 120)      | 100 (85, 127)     | 0.001   |
|                        | ECG QRS duration, msec           | 126 (104, 158)    | 148 (112, 178)    | <.001   |
|                        | Left atrial size, mm             | 46 (41, 51)       | 46 (41, 52)       | 0.320   |
|                        | LV end-systolic dimension, mm    | 53 (47, 60)       | 53 (47, 59)       | 0.345   |
| LVEF                   | 31-35%                           | 558 (16.2%)       | 115 (16.0%)       | 0.059   |
|                        | 21-30%                           | 2135 (62.0%)      | 419 (58.4%)       |         |

|      |             |             |
|------|-------------|-------------|
| ≤20% | 750 (21.8%) | 181 (25.2%) |
|------|-------------|-------------|

**Appendix Table B. Univariate predictors of appropriate shock competing with death**

| <b>Category</b>        | <b>Variable</b>                       | <b>Appropriate Shock Hazard Ratio (95%CI)</b> | <b>p-value</b> | <b>Mortality Hazard Ratio (95%CI)</b> | <b>p-value</b> |
|------------------------|---------------------------------------|-----------------------------------------------|----------------|---------------------------------------|----------------|
| Demographic            | Age, per 10 years                     | 0.89 (0.78, 1.01)                             | 0.076          | 1.57 (1.39, 1.78)                     | < .001         |
|                        | Male                                  | 1.69 (1.13, 2.54)                             | 0.011          | 1.16 (0.85, 1.58)                     | 0.350          |
| Heart disease etiology | Ischemic revascularized               | Reference                                     |                | Reference                             |                |
|                        | Ischemic not revascularized           | 1.35 (0.86, 2.12)                             | 0.190          | 1.20 (0.83, 1.73)                     | 0.330          |
|                        | Non-ischemic                          | 1.39 (0.84, 2.30)                             | 0.200          | 0.86 (0.55, 1.34)                     | 0.510          |
| Arrhythmias            | Non-sustained VT                      | 1.57 (1.08, 2.28)                             | 0.019          | 0.94 (0.63, 1.40)                     | 0.760          |
|                        | Atrial fibrillation                   | 1.66 (1.25, 2.21)                             | < .001         | 1.57 (1.22, 2.01)                     | < .001         |
|                        | Syncope                               | 1.41 (0.87, 2.30)                             | 0.160          | 1.23 (0.79, 1.92)                     | 0.350          |
|                        | Pre-existing pacemaker                | 2.07 (1.09, 3.90)                             | 0.025          | 2.59 (1.58, 4.26)                     | < .001         |
| Cardiovascular profile | Prior HF hospitalization <sup>†</sup> | 1.13 (0.86, 1.49)                             | 0.390          | 2.49 (1.95, 3.17)                     | < .001         |
|                        | Hypertension                          | 0.78 (0.59, 1.03)                             | 0.077          | 1.39 (1.08, 1.78)                     | 0.011          |
|                        | Diabetes                              | 1.12 (0.84, 1.49)                             | 0.440          | 1.81 (1.42, 2.30)                     | < .001         |
|                        | Smoker                                | 0.80 (0.60, 1.05)                             | 0.100          | 1.44 (1.11, 1.86)                     | 0.005          |
|                        | Stroke or TIA                         | 1.25 (0.65, 2.42)                             | 0.510          | 1.55 (0.90, 2.65)                     | 0.110          |
|                        | Peripheral vascular disease           | 0.90 (0.55, 1.46)                             | 0.670          | 2.02 (1.47, 2.78)                     | < .001         |
| CCS angina class       | I or none                             | Reference                                     |                | Reference                             |                |
|                        | II-IV                                 | 0.91 (0.53, 1.55)                             | 0.720          | 1.39 (0.94, 2.08)                     | 0.100          |
| NYHA class             | I-II                                  | Reference                                     |                | Reference                             |                |
|                        | III-IV                                | 1.07 (0.81, 1.43)                             | 0.620          | 2.14 (1.68, 2.72)                     | < .001         |
| Comorbidities          | COPD                                  | 0.77 (0.49, 1.22)                             | 0.270          | 1.91 (1.43, 2.56)                     | < .001         |
|                        | Cancer                                | 1.23 (0.79, 1.93)                             | 0.360          | 1.73 (1.22, 2.45)                     | 0.002          |
|                        | Cognitive impairment                  | 1.46 (0.20, 10.50)                            | 0.710          | 2.50 (0.61, 10.25)                    | 0.200          |
|                        | Home oxygen use                       | 1.08 (0.16, 7.13)                             | 0.940          | 8.31 (3.84, 18.00)                    | < .001         |
| Physical               | Walks without support                 | 1.18 (0.61, 2.28)                             | 0.630          | 0.40 (0.27, 0.58)                     | < .001         |
|                        | Systolic BP, per 20 mmHg              | 0.84 (0.73, 0.98)                             | 0.026          | 0.84 (0.73, 0.97)                     | 0.019          |
| Medications            | β-adrenoreceptor antagonists          | 1.27 (0.77, 2.08)                             | 0.350          | 0.73 (0.51, 1.03)                     | 0.074          |
|                        | ACE inhibitor or ARB                  | 1.01 (0.62, 1.64)                             | 0.980          | 0.53 (0.38, 0.74)                     | < .001         |
|                        | Spirolactone                          | 1.28 (0.96, 1.69)                             | 0.090          | 1.30 (1.01, 1.66)                     | 0.038          |
|                        | Loop diuretics                        | 1.36 (1.00, 1.84)                             | 0.051          | 2.04 (1.52, 2.74)                     | < .001         |
|                        | Digoxin                               | 1.69 (1.26, 2.25)                             | < .001         | 1.31 (1.00, 1.70)                     | 0.046          |
|                        | Amiodarone                            | 0.59 (0.31, 1.11)                             | 0.100          | 1.61 (1.11, 2.33)                     | 0.011          |
|                        | HMG-coA reductase inhibitor           | 0.82 (0.61, 1.11)                             | 0.200          | 1.12 (0.84, 1.48)                     | 0.450          |

|                      |                     |                   |        |                   |        |
|----------------------|---------------------|-------------------|--------|-------------------|--------|
|                      | Anti-platelet agent | 0.67 (0.51, 0.89) | 0.005  | 0.99 (0.77, 1.27) | 0.930  |
| Hemoglobin           | ≥12 g/dL            | Reference         |        | Reference         |        |
|                      | <12 g/dL            | 0.49 (0.29, 0.82) | 0.007  | 2.59 (1.99, 3.39) | < .001 |
| Sodium               | ≤138 mEq/L          | Reference         |        | Reference         |        |
|                      | >138 mEq/L          | 0.93 (0.70, 1.23) | 0.600  | 1.73 (1.36, 2.20) | < .001 |
| Serum creatinine     | Per 1 mg/dL         | 1.13(0.99, 1.28)  | 0.063  | 1.35(1.27, 1.44)  | < .001 |
| QRSd - 130           | Per 10 msec         | 0.84 (0.75, 0.95) | 0.005  | 0.90 (0.81, 0.99) | 0.039  |
| Left atrial size     | <45 mm              | Reference         |        | Reference         |        |
|                      | ≥45 mm              | 1.63 (1.24, 2.15) | < .001 | 1.52 (1.19, 1.93) | < .001 |
| LVESD                | <45 mm              | Reference         |        | Reference         |        |
|                      | ≥45 mm              | 1.43 (1.06, 1.93) | 0.019  | 1.07 (0.83, 1.38) | 0.590  |
| LV ejection fraction | 31-35%              | Reference         |        | Reference         |        |
|                      | 21-30%              | 1.21 (0.79, 1.85) | 0.370  | 1.38 (0.95, 2.01) | 0.092  |
|                      | ≤20%                | 1.56 (0.98, 2.50) | 0.061  | 1.40 (0.91, 2.15) | 0.120  |
| Device type          | Single chamber      | Reference         |        | Reference         |        |
|                      | Dual chamber        | 1.27 (0.89, 1.80) | 0.180  | 0.98 (0.70, 1.37) | 0.890  |
|                      | CRT-D               | 1.11 (0.81, 1.53) | 0.520  | 1.42 (1.09, 1.85) | 0.010  |

VT=ventricular tachycardia, HF=heart failure, TIA=transient ischemic attack, CCS=Canadian Cardiovascular Society, NYHA=New York Heart Association, COPD=chronic obstructive pulmonary disease, BP=blood pressure, ACE=angiotensin converting enzyme, ARB=angiotensin receptor blocker, QRSd=QRS duration, LV=left ventricular, LVESD=left ventricular end-systolic dimension, CRT-D=cardiac resynchronization therapy defibrillator

† Within previous 3 years, \* To convert creatinine into SI units (μmol/L), multiply value in mg/dL by 88.4

## **APPENDIX 1. Participating Hospitals and Investigators in the Ontario ICD Database**

*Defibrillator Implantation and Follow-up Sites:* Hamilton Health Sciences Centre (J.S. Healey), Kingston General Hospital (C.S. Simpson), London Health Sciences Centre (A.D. Krahn, R. Yee), Rouge Valley Health System (A. Janmohammed), St. Michael's Hospital (I. Mangat, P. Dorian), Southlake Regional Health Centre (Y. Khaykin), Sunnybrook Health Sciences Centre (E. Crystal), Toronto General Hospital (D. Cameron), Trillium Health Centre (C. LeFeuvre), University of Ottawa Heart Institute (D. Birnie)

*Non-Implanting Defibrillator Follow-up Sites:* Credit Valley Hospital (J. Cyriac), Grey Bruce Health Services (M. Newton), Hotel Dieu Grace Hospital (A. Glanz), Kawartha Cardiology Clinic (W. Hughes), St. Mary's General Hospital (C. Rinne), Scarborough General Hospital (E.G. Davies), Sudbury Regional Hospital (R. Labonte), Thunder Bay Regional Health Sciences Centre (C. Lai)
